# Supplementary material for: The course of recovery of locomotor function over a 10‐week observation period in a rat model of femoral nerve resection and autograft repair
Source: PubMed Central journal article supplement (PMC7177579; doi:10.1002/brb3.1580), 2020-02-25
Supplement: BRB3-10-e01580-s001.pdf [file BRB3-10-e01580-s001.pdf]

| <b>Parameter of gait</b>            | <b>Observed Power (<i>n</i> = 5)</b> |
|-------------------------------------|--------------------------------------|
| Print Area                          | >0.8                                 |
| Print Length                        | >0.8                                 |
| <b>Stride Length</b>                | <b>&lt;0.8 (0.042)</b>               |
| Base of Support                     | >0.8                                 |
| Duty Cycle                          | >0.8                                 |
| Swing Time                          | >0.8                                 |
| Swing Speed                         | >0.8                                 |
| <b>Regularity Index</b>             | <b>&lt;0.8 (0.799)</b>               |
| Phase Dispersions Left Ipsilateral  | >0.8                                 |
| Phase Dispersions Right Ipsilateral | >0.8                                 |
| Phase Dispersions Left Diagonal     | >0.8                                 |
| Phase Dispersions Right Diagonal    | >0.8                                 |
| Phase Dispersions Front Girdle      | >0.8                                 |
| Phase Dispersions Hind Girdle       | >0.8                                 |
| Step Sequence Aa                    | >0.8                                 |
| Step Sequence Ab                    | >0.8                                 |
| Step Sequence Ca                    | >0.8                                 |
| Step Sequence Cb                    | >0.8                                 |
| Step Sequence Ra                    | not calculated*                      |
| Step Sequence Rb                    | not calculated*                      |

**Supplementary data 1 - Observed power as calculated post-hoc for ANOVA with repeated measures with SPSS**

\*observed power was not calculated as there was no difference to the baseline value at any time point.
