# Supplementary material for: The course of recovery of locomotor function over a 10‐week observation period in a rat model of femoral nerve resection and autograft repair
Source: PubMed Central journal article supplement (PMC7177579; doi:10.1002/brb3.1580), 2020-02-25
Supplement: BRB3-10-e01580-s002.pdf [file BRB3-10-e01580-s002.pdf]

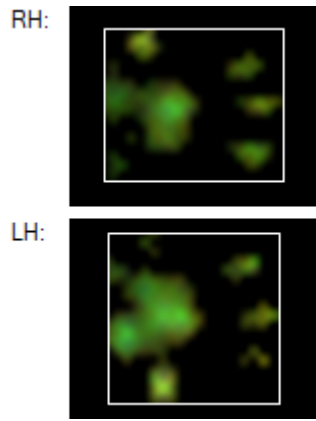

*Figure 2A-1 – Print Area of the right (top) and left hind paw (bottom) preoperatively*

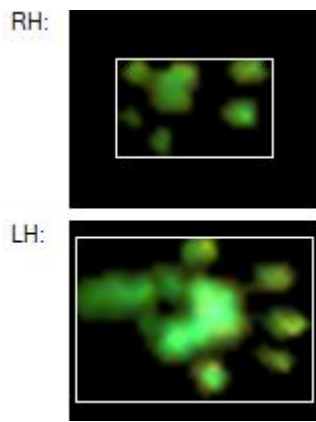

*Figure 2A-2 – Print Area of the right (top) and left hind paw (bottom) at WPO1*

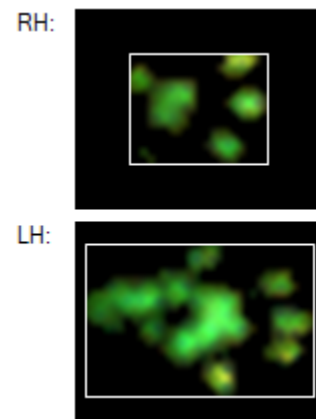

*Figure 2A-3 – Print Area of the right (top) and left hind paw (bottom) at WPO2*

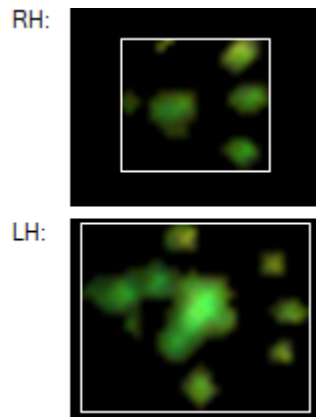

*Figure 2A-4 – Print Area of the right (top) and left hind paw (bottom) at WPO4*

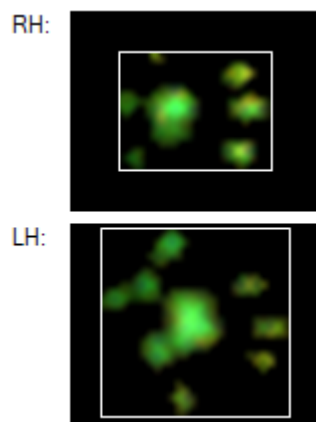

*Figure 2A-5 – Print Area of the right (top) and left hind paw (bottom) at WPO6*

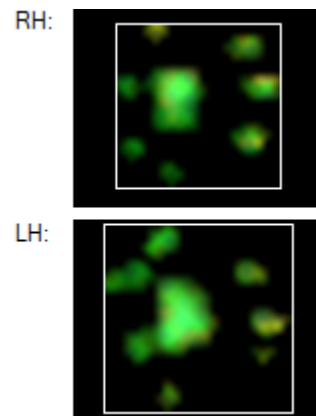

*Figure 2A-6 – Print Area of the right (top) and left hind paw (bottom) at WPO8*

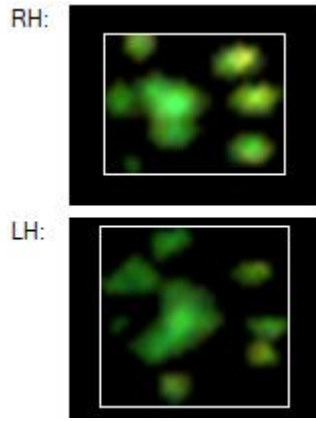

*Figure 2A-7 – Print Area of the right (top) and left hind paw (bottom) at WPO10*
