# Supplementary material for: The course of recovery of locomotor function over a 10‐week observation period in a rat model of femoral nerve resection and autograft repair
Source: PubMed Central journal article supplement (PMC7177579; doi:10.1002/brb3.1580), 2020-02-25
Supplement: BRB3-10-e01580-s003.pdf [file BRB3-10-e01580-s003.pdf]

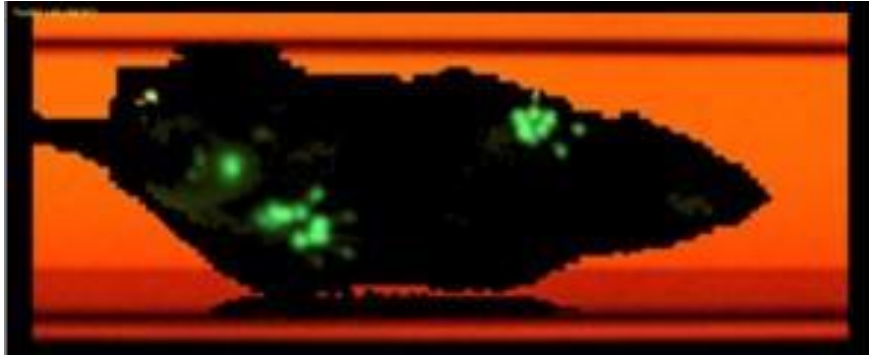

**Figure 2B-1** – CatWalk data of an animal which contaminates the walkway with urine during walking

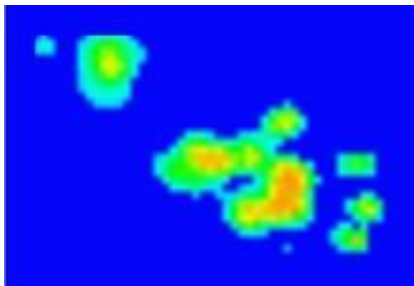

**Figure 2B-2** – Pawprint Picture of Figure 2B-1

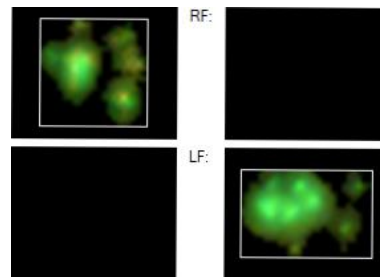

**Figure 2B-3** – Blurred paw prints

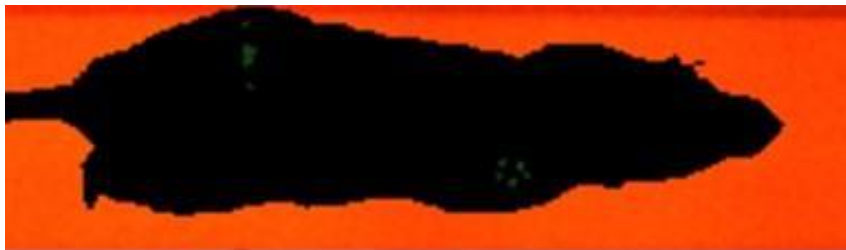

**Figure 2B-4** – CatWalk data of an animal which paws prints are only faintly visible due to insufficient camera settings

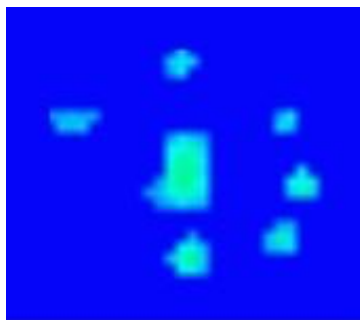

**Figure 2B-5** – Pawprint Picture of Figure 2B-4
